# Supplementary material for: The Optimized Preparation Conditions of Cellulose Triacetate Hollow Fiber Reverse Osmosis Membrane with Response Surface Methodology
Source: MDPI journal article supplement (doi:10.3390/polym15173569), 2023-08-28
Supplement: s1 [file s1]

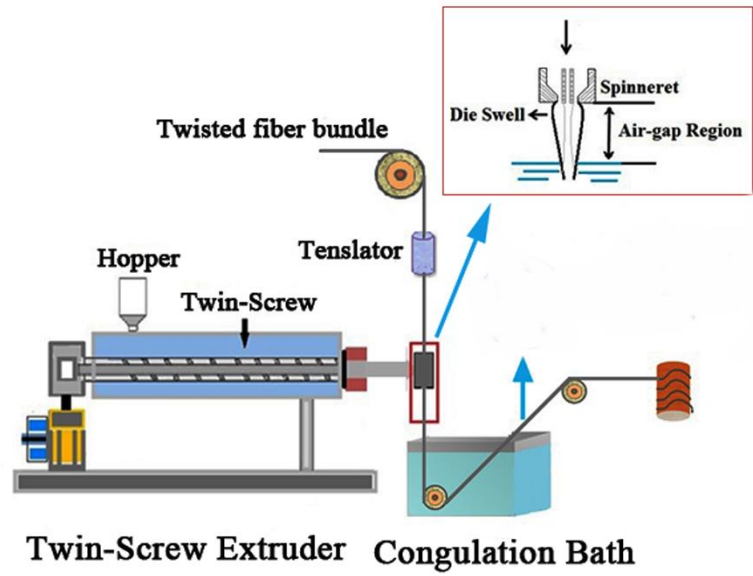

**Figure S1.** Schematic of RO membrane fabrication process [32].

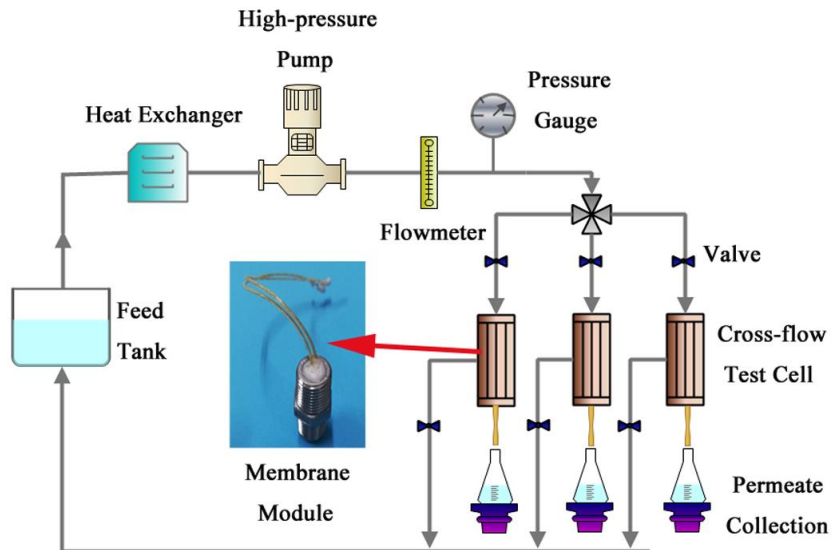

**Figure S2.** Schematic of evaluation RO membranes performance testing devices [32].
